# Supplementary material for: Mesoporous NaTi2(PO4)3/CMK-3 nanohybrid as anode for long-life Na-ion batteries
Source: Royal Society of Chemistry journal article supplement (doi:10.1039/c4ta04732j), 2014-01-01
Supplement: c4ta04732j1.pdf [file c4ta04732j1.pdf]

Electronic Supplementary material (ESI) for Journal of Materials Chemistry A  
This journal is © The Royal Society of Chemistry 2014

## **Electronic Supplementary Information (ESI)**

### **Mesoporous NaTi<sub>2</sub>(PO<sub>4</sub>)<sub>3</sub>/CMK-3 Nanohybrid as Promising Anode for Long-life Na-ion Batteries**

**Gang Pang,<sup>a, b</sup> Ping Nie,<sup>a</sup> Changzhou Yuan,<sup>b</sup> Laifa Shen,<sup>a</sup> Xiaogang Zhang,<sup>\*a</sup>  
Hongsen Li <sup>a</sup> and Cunliang Zhang <sup>a</sup>**

<sup>a</sup> College of Material Science & Engineering, Nanjing University of Aeronautics and Astronautics, Jiangsu Key Laboratory of Material and Technology for Energy Conversion, Nanjing, 210016, P. R. China. Fax: +86 025 52112626; Tel: +86 025 52112918; E-mail: azhangxg@163.com;

<sup>b</sup> School of Material Science & Engineering and Anhui Key Laboratory of Metal Materials and Processing, Anhui University of Technology, Maanshan, 243002, P. R. China

### Synthesis of the mesoporous CMK-3

Following the method reported by Zhao *et al.*,<sup>1</sup> SBA-15 templates were synthesized using Pluronic P123 ( $\text{EO}_{20}\text{PO}_{70}\text{EO}_{20}$ ,  $M_w \sim 5800$ ) as surfactant and tetraethylorthosilicate (TEOS) as silica source. A nanocasting method was used to prepare the CMK-3 from SBA-15 template. Typically, 1.25 g of sucrose was dissolved in a solution containing 11 mL of deionization (DI) water and 7.2 mL of 0.2 M  $\text{H}_2\text{SO}_4$ . 1.0 g of the prepared SBA-15 was then dispersed in the above solution and the mixture was ultrasonicated for 1 h. The mixture was then heated at 100 °C for 6 h and subsequently at 160 °C for another 6 h. The impregnation and baking process was repeated once with another aqueous solution containing 11 mL of DI water, 0.75 g of sucrose and 7.2 mL of 0.2 M  $\text{H}_2\text{SO}_4$ . The composite was completely carbonized at 900 °C for 5 h in an inert nitrogen atmosphere. To remove the SBA-15 silica template, the composite was stirred in 2 M hot NaOH solution twice. After that, the obtained CMK-3 carbon templates were functionalized by 6 M  $\text{HNO}_3$ .

- 1 D. Y. Zhao, J. L. Feng, Q. S. Huo, N. Melosh, G. H. Fredrickson, B. F. Chmelka and G. D. Stucky, *Science*, 1998, **279**, 548.

**Table S1** Atomic coordinates, isotropic thermal parameters and occupation numbers for the NTP phase refined from X-ray powder diffraction data. NASICON-type structure in space group R-3c (No. 167); cell parameters:  $a = 8.4884$  (5) Å,  $c = 21.8123$  (3) Å,  $V = 1361.07$  (2) Å<sup>3</sup> and  $Z = 6$ ;  $R_{wp} = 10.32$  %,  $R_p = 7.03$  %,  $R_I = 4.47$  %,  $S = 2.97$ .

| Atom | Site | g   | x         | y         | Z         | B (Å <sup>2</sup> ) |
|------|------|-----|-----------|-----------|-----------|---------------------|
| Na   | 6b   | 1.0 | 0.0       | 0.0       | 0.0       | 2.8(2)              |
| Ti   | 12c  | 1.0 | 0.0       | 0.0       | 0.1447(1) | 0.5(1)              |
| P    | 18e  | 1.0 | 0.2868(3) | 0.0       | 1/4       | 0.6(1)              |
| O1   | 36f  | 1.0 | 0.1751(6) | 0.9781(6) | 0.1934(2) | 0.7(1)              |
| O2   | 36f  | 1.0 | 0.1941(4) | 0.1635(4) | 0.0903(2) | 0.6(1)              |

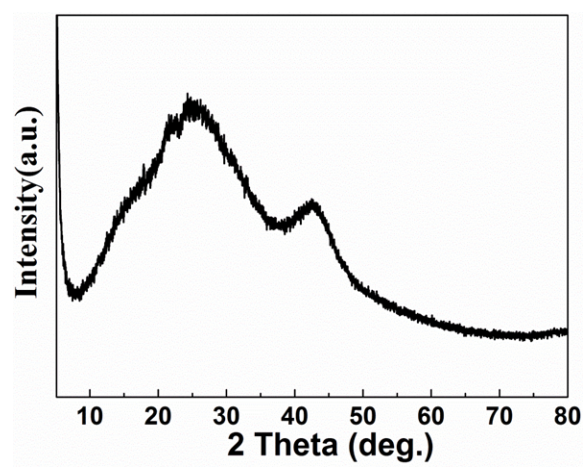

**Fig. S1** Wide angle X-ray diffraction pattern of the CMK-3.

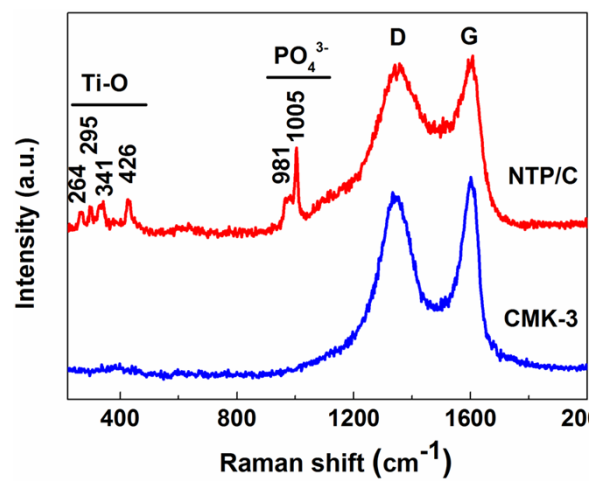

**Fig. S2** Raman spectrums of mesoporous NTP/C nanohybrid and CMK-3, showing the Raman band of Ti-O, PO<sub>4</sub><sup>3-</sup> and C.

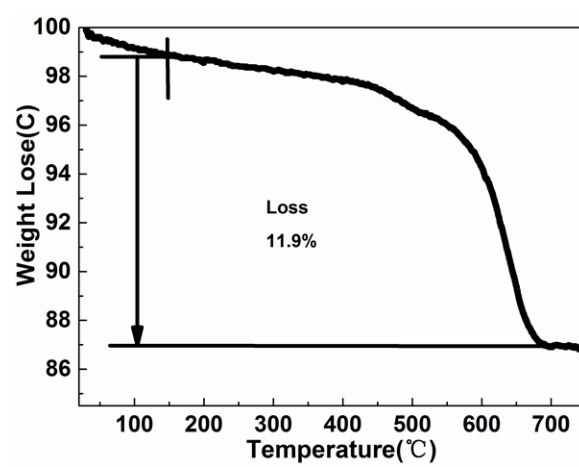

**Fig. S3** TG curve of the mesoporous NTP/C sample in air atmosphere.

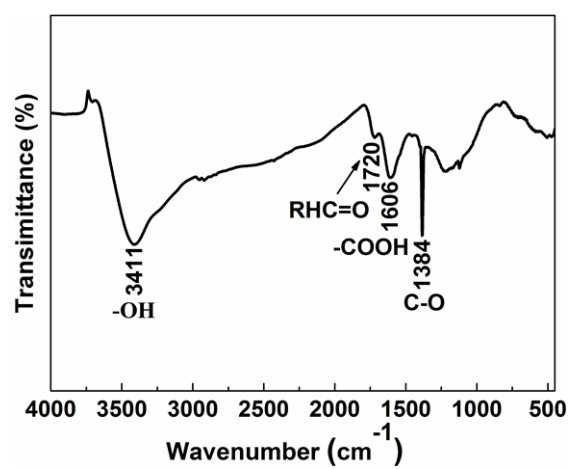

**Fig. S4** FT-IR spectrum of the acid-treated CMK-3 recorded in the range of 450-4000 cm<sup>-1</sup>.

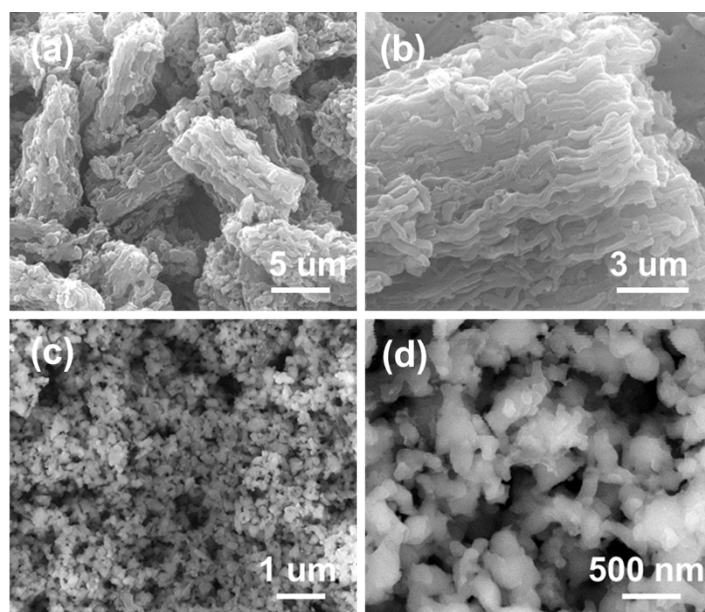

**Fig. S5** FESEM images of the CMK-3 (a, b) and mesoporous NTP/C nanohybrid (c, d).

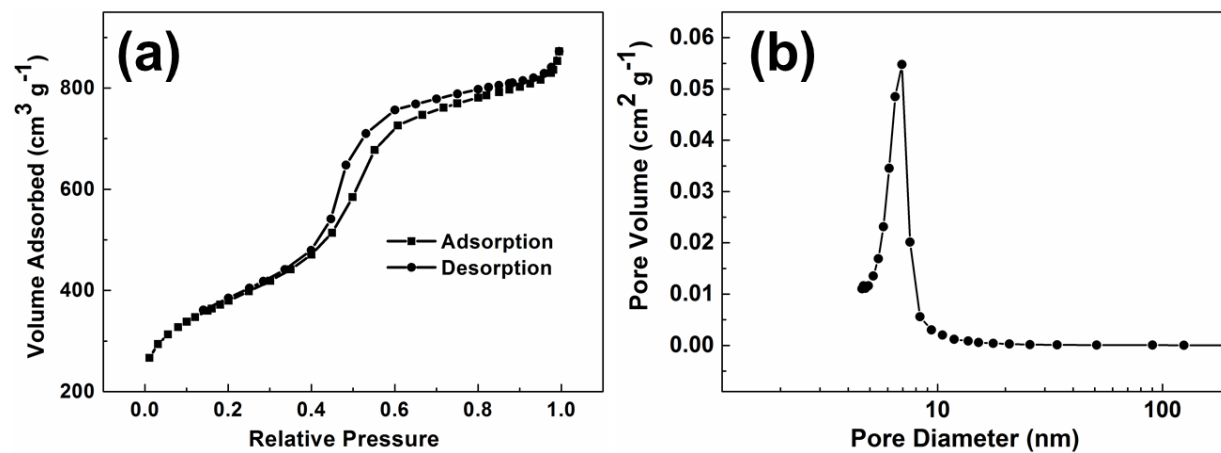

**Fig. S6** Nitrogen sorption isotherms (a) and PSD data (b) of the mesoporous CMK-3.

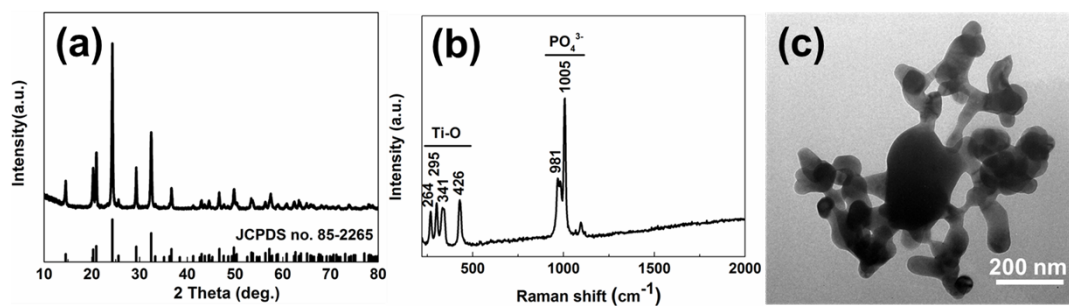

**Fig. S7** XRD pattern (a), Raman spectrum (b) and TEM image (c) of pure NTP. The black vertical lines in (a) for the standard spectrum of JCPDS no. 85-2265.
